# Supplementary material for: Accelerated Muscle Deoxygenation in Aerobically Fit Subjects During Exhaustive Exercise Is Associated With the ACE Insertion Allele
Source: Front Sports Act Living. 2022 Feb 28;4:814975. doi: 10.3389/fspor.2022.814975 (PMC8918772; doi:10.3389/fspor.2022.814975)
Supplement: Supplementary file 8 [file Table_6.XLSX]

## Sheet: values SmO2 used revised
muscle	ACE_ID	I_allele	D_allele	aerobically_fit	SmO2_baseline	SmO2min_proposed	delta_deoxgenation_proposed	t_deox	slope_deox	SmO2_max	delta_reoxygenation	t_half_reoxygenation	slope_reoxygenation	SmO2_overshoot
GAS	ID	yes	yes	no	43	36	-7	298	-0.0234899	38	13	19	0.342	-5
GAS	II	yes	no	no	50	20	-30	392	-0.0765306	40	20	58	0.172	-10
GAS	ID	yes	yes	no	50	37	-13	378	-0.0343915	45	8	22.5	0.178	-5
GAS	ID	yes	yes	no	53	31	-22	404	-0.0544554	44	15	20	0.375	-9
GAS	ID	yes	yes	yes	46	13	-33	658	-0.050152	31	18	6	1.5	-15
GAS	ID	yes	yes	yes	55	35	-20	598	-0.0334448	60	25	23	0.543	5
GAS	DD	no	yes	no	47	17	-30	282	-0.106383	37	28	10	1.4	-10
GAS	ID	yes	yes	yes	54.94	9	-45.94	550	-0.0835273	56	47	77	0.305	1.06
GAS	ID	yes	yes	no	41	20	-21	382	-0.0549738	42	22	15	0.733	1
GAS	ID	yes	yes	no	63	31	-32	594	-0.0538721	58	27	13.5	1	-5
GAS	II	yes	no	yes	61	19	-42	594	-0.0707071	53	34	18	0.944	-8
GAS	ID	yes	yes	no	44	22	-22	324	-0.0679012	34	19	4.5	2.111	-10
GAS	DD	no	yes	no	62.5	21	-41.5	585	-0.0709402	47	39	27	0.722	-15.5
GAS	ID	yes	yes	yes	44	40	-4	232	-0.0172414	48	27	5	2.7	4
GAS	II	yes	no	no	60	36.5	-23.5	747	-0.0314592	71	34.5	40.5	0.426	11
GAS	II	yes	no	no	42	27.5	-14.5	369	-0.0392954	41	13.5	13.5	0.5	-1
GAS	ID	yes	yes	no	50	30	-20	378	-0.0529101	48	19	99	0.096	-2
GAS	ID	yes	yes	yes	55	22.5	-32.5	558	-0.0582437	47	27	18	0.75	-8
GAS	II	yes	no	no	35	38	3	495	0.00606061	35	12	67.5	0.089	0
GAS	II	yes	no	yes	75	22	-53	504	-0.105159	52	30	31.5	0.476	-23
GAS	ID	yes	yes	yes	44	30	-14	666	-0.021021	45	15	20	0.375	1
GAS	ID	yes	yes	yes	45	31	-14	688	-0.0203488	46	15	10	0.75	1
GAS	II	yes	no	no	50	15	-35	596	-0.0587248	55	44	33	0.667	5
GAS	II	yes	no	no	50	26	-24	500	-0.048	36	23	11	1.046	-14
GAS	ID	yes	yes	yes	55	19	-36	514	-0.0700389	39	34	28	0.607	-16
GAS	DD	no	yes	yes	60	21	-39	550	-0.0709091	59	39	33	0.591	-1
GAS	ID	yes	yes	yes	61	23	-38	518	-0.0733591	52	29	26	0.558	-9
GAS	ID	yes	yes	yes	45	20	-25	450	-0.0555556	55	37	30	0.617	10
GAS	II	yes	no	yes	54	15	-39	662	-0.0589124	64	55	32	0.859	10
GAS	DD	no	yes	no	42	37	-5	538	-0.00929368	67	43	77	0.279	25
GAS	ID	yes	yes	yes	55	24	-31	518	-0.0598456	60	36	68	0.265	5
GAS	DD	no	yes	no	40	39	-1	360	-0.00277778	51	12	8	0.75	11
GAS	ID	yes	yes	no	56	44	-12	426	-0.028169	66	22	42	0.262	10
GAS	ID	yes	yes	no	40	25	-15	486	-0.0308642	39	14	9	0.778	-1
VAS	ID	yes	yes	no	56	25	-31	298	-0.104027	65	40	19	1.053	9
VAS	II	yes	no	no	59.69	47.41	-12.28	370	-0.0331892	57.8	10.44	22	0.237	-1.89
VAS	ID	yes	yes	no	52.4	37.36	-15.04	370	-0.0406486	56.5	19.1	82	0.116	4.1
VAS	ID	yes	yes	no	57.19	31.98	-25.21	368	-0.0685054	76.9	44.89	36	0.624	19.71
VAS	ID	yes	yes	yes	48.12	27.86	-20.26	436	-0.0464679	73.6	45.78	34	0.673	25.48
VAS	ID	yes	yes	yes	54.53	24.07	-30.46	524	-0.0581298	82	57.96	32	0.906	27.47
VAS	DD	no	yes	no	51.73	19.43	-32.3	252	-0.128175	72.4	52.96	34	0.779	20.67
VAS	ID	yes	yes	yes	60.29	22	-38.29	514	-0.0744942	74	52	52	0.522	13.71
VAS	ID	yes	yes	no	52.62	42.54	-10.08	380	-0.0265263	64.2	21.65	28	0.387	11.58
VAS	ID	yes	yes	no	77.52	31.6	-45.92	582	-0.0789003	85	53.43	38	0.703	7.48
VAS	II	yes	no	yes	69.38	24.88	-44.5	594	-0.0749158	85.8	60.97	32	0.953	16.42
VAS	ID	yes	yes	no	49.92	32.29	-17.63	304	-0.0579934	68.5	36.17	50	0.362	18.58
VAS	DD	no	yes	no	57.55	30.73	-26.82	564	-0.0475532	65.3	34.56	34	0.508	7.75
VAS	ID	yes	yes	yes	54.41	28.03	-26.38	622	-0.0424116	83.2	55.2	30	0.92	28.79
VAS	II	yes	no	no	73	44.31	-28.69	732	-0.039194	83.6	39.27	54	0.364	10.6
VAS	II	yes	no	no	54.04	35.28	-18.76	346	-0.0542197	78.6	43.32	34	0.637	24.56
VAS	ID	yes	yes	no	76.93	47.66	-29.27	370	-0.0791081	64.6	16.97	28	0.303	-12.33
VAS	ID	yes	yes	yes	61.71	36.91	-24.8	544	-0.0455882	80.4	43.52	24	0.907	18.69
VAS	II	yes	no	no	46.56	37.7	-8.86	474	-0.018692	57.7	19.99	86	0.116	11.14
VAS	II	yes	no	yes	80.35	33.9	-46.45	476	-0.097584	85	51.1	34	0.752	4.65
VAS	ID	yes	yes	yes	55.09	21.38	-33.71	640	-0.0526719	85.6	64.21	40	0.803	30.51
VAS	ID	yes	yes	yes	74.21	24.71	-49.5	842	-0.0587886	69.6	44.86	30	0.748	-4.61
VAS	II	yes	no	no	67.87	52.27	-15.6	588	-0.0265306	86.6	34.32	26	0.66	18.73
VAS	II	yes	no	no	63.04	46.48	-16.56	476	-0.0347899	74.5	28.05	22	0.638	11.46
VAS	ID	yes	yes	yes	59.71	24.98	-34.73	508	-0.0683661	81.3	56.32	40	0.704	21.59
VAS	DD	no	yes	yes	63.07	26.17	-36.9	504	-0.0732143	82.3	56.08	52	0.539	19.23
VAS	ID	yes	yes	yes	67.33	15.68	-51.65	522	-0.0989464	85.2	69.56	36	0.966	17.87
VAS	ID	yes	yes	yes	39.78	20.43	-19.35	438	-0.0441781	78.9	58.44	34	0.859	39.12
VAS	II	yes	no	yes	47.64	15.51	-32.13	448	-0.0717188	76.6	61.04	26	1.174	28.96
VAS	DD	no	yes	no	50.62	25.23	-25.39	380	-0.0668158	81.6	56.41	28	1.007	30.98
VAS	ID	yes	yes	yes	50.6	28.68	-21.92	562	-0.0390036	77.6	48.94	18	1.359	27
VAS	DD	no	yes	no	47.19	36.47	-10.72	350	-0.0306286	72.9	36.47	38	0.48	25.71
VAS	ID	yes	yes	no	51.02	15.19	-35.83	360	-0.0995278	87.1	71.96	42	0.857	36.08
VAS	ID	yes	yes	no	41	35	-6	480	-0.0125	60	25	49	0.255	19
